# Supplementary material for: Denosumab treatment is associated with the absence of circulating tumor cells in patients with breast cancer
Source: PubMed Central journal article supplement (PMC6247738; doi:10.1186/s13058-018-1067-y), 2018-11-20
Supplement: 13058_2018_1067_MOESM8_ESM.pdf [file 13058_2018_1067_MOESM8_ESM.pdf]

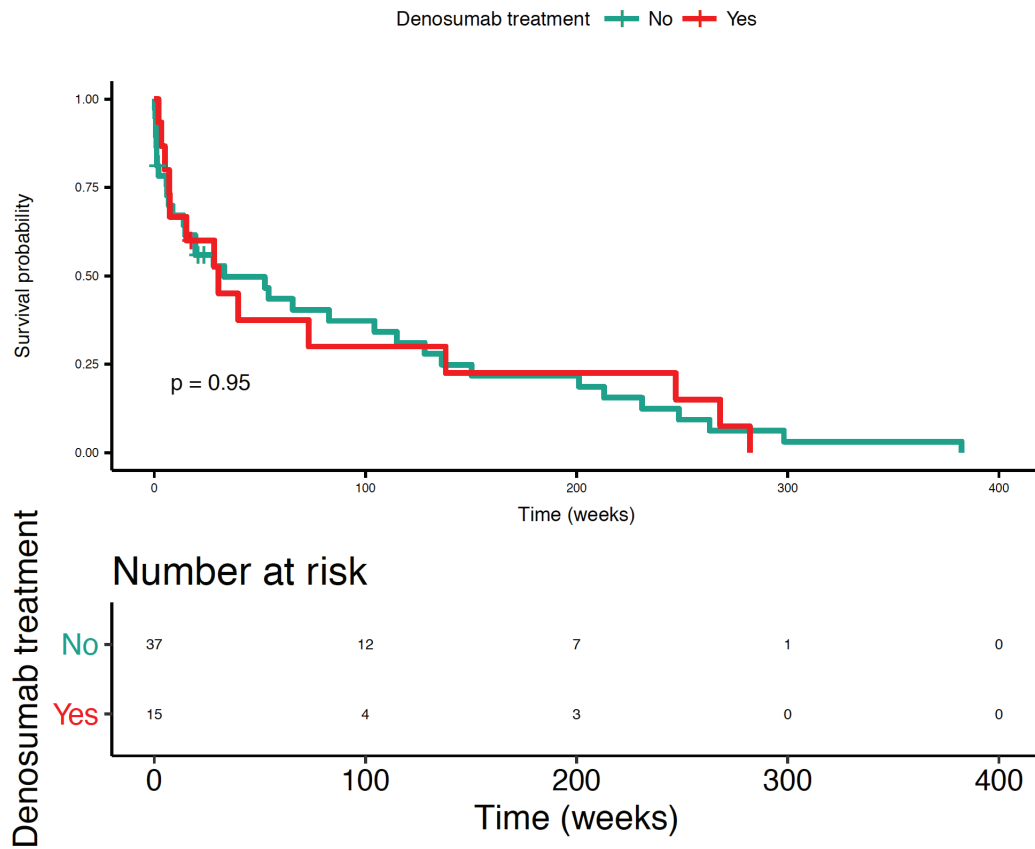

**Supplementary Figure 2: Progression-free survival of patients that were treated or not with Denosumab.** Kaplan-Meier curve showing the progression-free survival probability of patients that were treated (*red*) or not (*green*) with Denosumab (*top*).  $P=0.95$  by pairwise Log-Rank test. The table shows the number of patients at each timepoint (*bottom*).
