# Supplementary material for: Denosumab treatment is associated with the absence of circulating tumor cells in patients with breast cancer
Source: Breast Cancer Res. 2018 Nov 20;20:141. doi: 10.1186/s13058-018-1067-y (PMC6247738; doi:10.1186/s13058-018-1067-y)
Supplement: Supplementary file 3 — Table S3. Patient characteristics. The table shows the characteristics of the 73 patients included in the study. Abbreviations: ER Estrogen receptor, HER2 Human epidermal growth factor receptor 2, ID Invasive ductal, IL Invasive lobular, NA Not available, PR Progesterone receptor, ECOG Eastern Cooperative Oncology Group (as defined by Oken et al. [24]). (XLSX 14 kb) [file 13058_2018_1067_MOESM3_ESM.xlsx]

## Sheet: Supplementary Table 3
Supplementary Table 3: Patient Characteristics.
Patient	Age at primary diagnosis	Age at first CTC evaluation	% of ER+ cells	% of PR+ cells	% of KI67+ cells	HER2+	Histologic subtype	Tumor grade	Established metastatic disease at CTC evaluation	ECOG at CTC evaluation	Therapy at CTC evaluation	Accumulated Therapy at CTC evaluation
Br1	47.69	54.18	90	90	NA	0	ID	3	yes	1	none	none
Br2	57.6	72.39	1	1	NA	NA	IL	3	yes	1	Hormone	Hormone; Chemotherapy
Br3	56.77	57.54	35	0	40	1	ID	3	yes	1	Targeted; Chemotherapy	Targeted; Chemotherapy
Br4	53.48	54.96	80	5	30	0	IL	3	yes	1	Chemotherapy	Chemotherapy
Br6	74.74	81.68	70	80	NA	0	IL	2	yes	3	none	none
Br7	41.88	41.92	90	90	25	0	ID inflammatory	2	yes	1	none	none
Br8	64.51	69.5	70	30	10	0	ID	2	yes	1	Hormone	Hormone
Br9	60.16	62.67	70	30	60	0	ID	3	yes	1	Hormone	Chemotherapy; Hormone
Br10	48.45	64.72	100	0	NA	0	ID	1	yes	0-1	Hormone	Hormone; Chemotherapy
Br11	53.81	56.31	0	0	50	0	ID	3	yes	1	Chemotherapy	Chemotherapy
Br12	60.1	67.11	90	70	NA	0	IL	2	yes	NA	Chemotherapy	Hormone; Chemotherapy; Targeted
Br13	56.02	61.47	100	5	5	0	IL	2	yes	0-1	Targeted; Hormone	Hormone; Targeted
Br14	72.68	74.76	100	10	NA	0	ID	2	yes	1	none	Hormone; none
Br15	38.05	42.9	100	75	NA	NA	ID	1	yes	1	Hormone	Hormone; Targeted
Br16	38.71	49.04	100	75	NA	0	ID	2	yes	2	Chemotherapy	Hormone; Chemotherapy
Br17	54.82	66.94	1	1	NA	0	ID	1	yes	2	Hormone	Chemotherapy; Hormone
Br18	59.89	63.61	80	0	NA	0	ID	3	yes	0-1	Chemotherapy	Hormone; Chemotherapy
Br19	40.05	42.48	0	0	NA	1	ID	2	yes	1	Targeted	Targeted; Chemotherapy
Br20	40.86	45.26	80	80	35	0	ID	3	yes	0-1	none	none
Br21	55.47	69.23	100	70	NA	0	IL	2	yes	1	none	none
Br22	53.35	66.15	100	90	NA	0	ID	2	yes	2018-02-01	Hormone	Hormone
Br23	63.02	63.05	100	0	NA	0	IL	2	yes	1	Hormone	Hormone
Br25	39.02	45.84	70	15	NA	0	ID	2	yes	0-1	Hormone	Hormone
Br27	62.22	64.26	100	5	20	1	ID	2	yes	1	Targeted; Chemotherapy	Targeted; Chemotherapy
Br29	53.22	54.32	0	0	70	0	ID	3	yes	2018-03-02	none	none
Br30	48.99	50.64	80	70	25	0	ID	3	yes	1	none	Chemotherapy; none
Br31	81.68	81.92	100	5	25	0	ID	3	yes	1	Hormone	Hormone
Br32	68.32	68.43	90	100	20	1	ID	3	yes	NA	Hormone; Targeted	Hormone; Targeted
Br33	53.18	68.71	0	0	NA	1	ID	3	yes	1	Targeted	Targeted; Chemotherapy
Br34	49.93	65.51	1	1	NA	0	IL	2	yes	0	Hormone	Hormone
Br35	71.97	78.42	70	50	15	0	IL	2	yes	1	Chemotherapy	Chemotherapy
Br36	59.84	59.89	50	0	50	1	ID	3	no	0-1	Hormone	Hormone
Br37	67.19	67.25	70	0	27.5	1	ID	3	yes	0	Targeted; Chemotherapy	Targeted; Chemotherapy
Br38	36.12	36.16	90	50	50	0	ID	2	no	0-1	none	none
Br39	47.38	53.28	60	30	10	0	ID	3	yes	2	Chemotherapy	Hormone; Chemotherapy
Br40	79.82	79.87	100	100	5	0	ID	1	yes	3	Hormone	Hormone
Br41	49.9	61.54	100	100	NA	0	ID	2	yes	1	Hormone	Hormone
Br42	78.76	78.83	80	10	20	0	ID	2	yes	2018-02-01	Hormone	Hormone
Br43	69.87	74.73	100	70	25	0	ID	2	yes	2	none	none
Br44	46.84	50.22	100	80	30	1	ID	2	yes	0-1	none	none
Br45	44.68	49.06	100	80	10	0	ID	1	yes	1	none	none
Br46	49.27	49.29	0	0	80	0	ID	3	no	0	none	none
Br47	74.53	77.16	0	0	10	0	ID	3	yes	2018-03-02	Targeted; Chemotherapy	Targeted; Chemotherapy
Br48	60.93	65.38	100	100	10	0	ID	1	yes	0	none	none
Br49	77.33	77.37	100	10	20	0	ID	3	no	0	none	none
Br50	52.19	52.22	90	90	5	0	ID	1	no	NA	none	none
Br51	54.13	55.65	0	0	27.5	NA	ID	3	yes	NA	none	none
Br52	48.66	68.15	100	50	35	0	ID	3	yes	1	none	none
Br53	48.22	58.81	1	0	NA	0	ID	NA	yes	1	Hormone	Hormone
Br54	56.91	58.06	100	50	20	0	ID inflammatory	2	yes	1	Chemotherapy	Hormone; Chemotherapy
Br55	62.56	62.63	0	0	15	1	ID	2	yes	0	none	none
Br56	70.09	73.19	50	0	35	0	ID	3	no	3	Chemotherapy	Chemotherapy
Br57	55.39	55.41	95	5	NA	0	ID	3	yes	3	none	none
Br58	66.44	66.48	90	50	30	0	IL	3	yes	0	none	none
Br59	46.32	49.95	100	5	50	1	ID	2	yes	0	Targeted	Targeted; Chemotherapy
Br60	53.88	72.05	100	50	NA	0	NA	NA	yes	1	Hormone	Hormone
Br61	59.82	62.39	60	0	NA	0	ID	2	yes	0-1		Chemotherapy
Br62	80.44	85.61	100	1	20	0	ID	2	yes	2018-02-01	Hormone	Hormone
Br63	57.92	60.85	0	0	90	0	ID	3	no	0	Chemotherapy	Chemotherapy
Br64	40.33	50.62	90	2	NA	1	ID	3	yes	1	none	none
Br65	70.02	70.02	0	0	20	0	inflammatory	3	yes	1	none	none
Br66	57.76	74.59	1	NA	NA	0	ID	3	yes	1	Targeted; Hormone	Hormone; Targeted
Br67	56.72	69.65	90	90	NA	0	ID	1	yes	0	Hormone; Targeted	Hormone; Targeted
Br68	46.04	54.13	95	90	NA	0	ID	2	yes	0	none	none
Br69	45.78	45.84	0	NA	10	1	inflammatory	2	yes	0	none	none
Br70	44.61	46.13	100	5	NA	0	ID	2	yes	1	Chemotherapy	Chemotherapy; Hormone
Br71	61.18	61.16	90	80	30	0	ID	2	yes	NA	none	none
Br72	41.46	42.95	10	0	15	1	ID	3	no	0-1	Chemotherapy; Targeted	Chemotherapy; Targeted
Br73	79.43	79.49	0	2	20	1	ID	3	yes	0	Targeted; Chemotherapy	Targeted; Chemotherapy
Br74	65.36	68.02	0	70	50	0	ID	2	yes	0-1	Hormone	Hormone
Br75	55.48	60.72	20	0	25	0	ID	2	yes	NA	none	none
Br76	55.4	57.02	0	0	30	0	ID	3	yes	1	Targeted; Chemotherapy	Chemotherapy; Targeted
Br77	54.63	55.75	100	20	40	0	ID	3	yes	0-1	Hormone	Hormone
The table shows the characteristics of the 73 patients included in the study. Abbreviations: ER, estrogen receptor; HER2, human epidermal growth factor receptor 2; ID, invasive ductal; IL, invasive lobular; NA, not available; PR, progesteron receptor; ECOG, eastern cooperative oncology group (as defined by Oken et al., Am J Clin Oncol, 1982).
